# Supplementary material for: PTSD and Partial PTSD among First Responders One and Five Years after the Paris Terror Attacks in November 2015
Source: MDPI journal article supplement (doi:10.3390/ijerph20054160), 2023-02-25
Supplement: s1 [file s1]

## Supplementary Materials

Table S1: Sociodemographic characteristics, exposure, mental health history, previous traumatic or difficult events, training and social isolation, COVID-19 concern by first responder category (wave 2 ESPA 13 November survey), n=428.

|                                                   | Total       |        | Health professionals |        | Affiliated volunteers |        | Firefighters |        | Police officers |         | p                 |
|---------------------------------------------------|-------------|--------|----------------------|--------|-----------------------|--------|--------------|--------|-----------------|---------|-------------------|
|                                                   | n           | (%)    | n                    | (%)    | n                     | (%)    | n            | (%)    | n               | (%)     |                   |
| <b>Gender</b>                                     |             |        |                      |        |                       |        |              |        |                 |         | <b>&lt;0.0001</b> |
| Female                                            | 123         | (28.7) | 66                   | (61.1) | 24                    | (32.9) | 14           | (7.4)  | 19              | (32.2)  |                   |
| Male                                              | 305         | (71.3) | 42                   | (38.9) | 49                    | (67.1) | 174          | (92.6) | 40              | (67.8)  |                   |
| <b>Mean age (SD) (10 MV<sup>#</sup>)</b>          | 41.1 (10.2) |        | 48.6 (11.0)          |        | 38.4 (8.8)            |        | 36.5 (7.6)   |        | 45.3 (8.1)      |         | <b>&lt;0.0001</b> |
| <b>Level of study (1 MV)</b>                      |             |        |                      |        |                       |        |              |        |                 |         | <b>&lt;0.0001</b> |
| No high-school degree                             | 45          | (10.5) | 3                    | (2.8)  | 7                     | (9.6)  | 34           | (18.2) | 1               | (1.7)   |                   |
| High-school diploma                               | 101         | (23.6) | 4                    | (3.7)  | 9                     | (12.3) | 74           | (39.6) | 14              | (23.7)  |                   |
| Graduate or post-graduate diploma                 | 281         | (65.8) | 101                  | (93.5) | 57                    | (78.1) | 79           | (42.2) | 44              | (75.6)  |                   |
| <b>Intervention category (exposure)</b>           |             |        |                      |        |                       |        |              |        |                 |         | <b>&lt;0.0001</b> |
| 1- in unsecured crime scenes *                    | 217         | (50.7) | 11                   | (10.2) | 40                    | (54.8) | 145          | (77.1) | 21              | (35.6)  |                   |
| 2- in secured or remote crime scenes **           | 114         | (26.6) | 35                   | (32.4) | 20                    | (27.4) | 35           | (18.6) | 24              | (40.7)  |                   |
| 3- only during the 3 weeks following the attacks  | 97          | (22.7) | 62                   | (57.4) | 13                    | (27.4) | 8            | (4.3)  | 14              | (23.7)  |                   |
| <b>History of antidepressant use (37 MV)</b>      | 20          | (5.1)  | 8                    | (8.1)  | 5                     | (7.3)  | 5            | (3.0)  | 2               | (3.6)   | 0.21              |
| <b>History of mental health follow-up (38 MV)</b> | 45          | (11.5) | 16                   | (16.2) | 10                    | (14.5) | 11           | (6.6)  | 8               | (14.8)  | 0.06              |
| <b>Living alone (4 MV)</b>                        | 78          | (18.4) | 26                   | (24.3) | 23                    | (31.5) | 18           | (9.7)  | 11              | (18.64) | <b>0.0002</b>     |
| <b>Number of somatic problems present</b>         | 1.73 (2.0)  |        | 2.04 (2.0)           |        | 1.86 (1.9)            |        | 1.27 (1.8)   |        | 2.48 (2.0)      |         | <b>&lt;0.0001</b> |

[illegible]

|                                                                                                                           | Total |         | Health professionals |        | Affiliated volunteers |        | Firefighters |        | Police officers |        | p            |
|---------------------------------------------------------------------------------------------------------------------------|-------|---------|----------------------|--------|-----------------------|--------|--------------|--------|-----------------|--------|--------------|
|                                                                                                                           | n     | (%)     | n                    | (%)    | n                     | (%)    | n            | (%)    | n               | (%)    |              |
| After or before                                                                                                           | 117   | (29.8)  | 23                   | (23.0) | 13                    | (18.4) | 61           | (36.3) | 20              | (36.4) |              |
| Before and after                                                                                                          | 214   | (54.6)  | 67                   | (67.0) | 47                    | (68.1) | 83           | (49.4) | 17              | (30.9) |              |
| Neither before nor after                                                                                                  | 61    | (15.6)  | 10                   | (10.0) | 9                     | (14.7) | 24           | (24.3) | 18              | (29.5) |              |
| <b>Low moral support</b><br>(41 MV)                                                                                       | 14    | (3.6)   | 2                    | (2.0)  | 1                     | (1.5)  | 6            | (3.6)  | 5               | (9.1)  | 0.10         |
| <b>Low financial support</b><br>(40 MV)                                                                                   | 93    | (24.0)  | 32                   | (32.3) | 10                    | (14.9) | 34           | (20.4) | 17              | (30.9) | <b>0.02</b>  |
| <b>Low everyday social support</b> (40 MV)                                                                                | 57    | (14.7)  | 18                   | (18.2) | 9                     | (13.4) | 24           | (14.3) | 6               | (10.9) | 0.64         |
| <b>Social isolation</b> (41 MV)                                                                                           | 53    | (13.7)  | 13                   | (13.7) | 11                    | (16.4) | 19           | (11.4) | 10              | (18.2) | 0.55         |
| <b>Knowing someone who could help regarding psychosocial risks</b> (36 MV)                                                | 281   | (71.7)  | 81                   | (81.0) | 51                    | (73.9) | 113          | (67.3) | 36              | (65.5) | 0.07         |
| <b>Relatives directly threatened by terrorists and/or physically or psychologically injured during the attacks</b> (1 MV) | 60    | (14.0)  | 11                   | (10.3) | 12                    | (16.4) | 30           | (16.0) | 7               | (11.9) | 0.49         |
| <b>Concern about the COVID-19 epidemic (scale of 0 to 10)</b>                                                             |       |         |                      |        |                       |        |              |        |                 |        | <b>0.002</b> |
| <b>0-3</b>                                                                                                                | 194   | (45.3)  | 35                   | (32.4) | 30                    | (41.1) | 102          | (54.3) | 27              | (45.8) |              |
| <b>3-7</b>                                                                                                                | 173   | (40.4)  | 49                   | (45.4) | 28                    | (38.4) | 71           | (37.8) | 25              | (42.4) |              |
| <b>7-10</b>                                                                                                               | 61    | (14.2)  | 24                   | (22.2) | 15                    | (20.5) | 15           | (8.0)  | 7               | (11.9) |              |
| <b>Total</b>                                                                                                              | 428   | (100.0) | 108                  | (25.2) | 73                    | (17.1) | 188          | (43.9) | 59              | (13.8) |              |

# Missing Value.

\*for people who both intervened in unsecured crime scenes (1) and intervened during the 3 following weeks (3), exposure category (1) is retained.

\*\* for people who both intervened in secured crime scenes or were distant from the crime scene during the night of the attack (2) and intervened during the 3 following weeks (3), exposure category (2) is retained.



Table S2: Multivariate regression analysis of the comparison between those who participated only in wave 1 and those who participated in both waves.

|                                                                                                    | OR          | CI                | p           |
|----------------------------------------------------------------------------------------------------|-------------|-------------------|-------------|
| <b>PTSD</b>                                                                                        |             |                   | 0.05        |
| No PTSD                                                                                            | 1.00        | -                 |             |
| Partial PTSD                                                                                       | 0.77        | 0.49-1.22         | 0.26        |
| PTSD                                                                                               | <b>0.41</b> | <b>0.19-0.88</b>  | <b>0.02</b> |
| <b>Gender</b>                                                                                      |             |                   |             |
| Male                                                                                               | 1.00        | -                 |             |
| Female                                                                                             | 1.04        | 0.7 0-1.53        | 0.86        |
| <b>First responder category</b>                                                                    |             |                   | 0.05        |
| Firefighters                                                                                       | 1.00        | -                 |             |
| Affiliated volunteers                                                                              | 1.48        | 0.94-2.42         | 0.11        |
| Police officers                                                                                    | 0.96        | 0.56-1.65         | 0.89        |
| Health professionals                                                                               | <b>1.88</b> | <b>1.08-3.26</b>  | <b>0.02</b> |
| <b>Intervention category (exposure)</b>                                                            |             |                   | 0.39        |
| 1- On the evening of November 13 and at unsecured crime scenes*                                    | 0.74        | 0.48-1.14         | 0.17        |
| 2- The evening of November 13 and at secured crime scenes or at a distance from the crime scenes** | 1.00        | -                 |             |
| 3- Only during the 3 weeks following the attacks                                                   | 0.92        | 0.57-1.48         | 0.73        |
| <b>Low everyday social support</b>                                                                 |             |                   |             |
| No                                                                                                 | 1.00        | -                 |             |
| Yes                                                                                                | <b>0.53</b> | <b>0.3 0-0.93</b> | <b>0.03</b> |

\*for those who responded to both unsecured crime scenes (1) and those who responded within the following 3 weeks (3), exposure category (1) is retained.

\*\* For persons who responded to both secured crime scenes or who were away from the crime scenes on the night of the attack (2) and who responded within the following 3 weeks (3), exposure category (2) is retained.
